# Supplementary material for: Healthy-Canteen Displays: A Tactic to Encourage Community Sport Canteens to Provide Healthier Food and Beverage Options
Source: MDPI journal article supplement (doi:10.3390/ijerph181910194), 2021-09-28
Supplement: s1 [file s1]

## Survey 1

|                                                                                                                |  |  |  |  |  |  |  |  |  |
|----------------------------------------------------------------------------------------------------------------|--|--|--|--|--|--|--|--|--|
| <b>Please select which option best represents the canteen at your venue:</b>                                   |  |  |  |  |  |  |  |  |  |
| No canteen                                                                                                     |  |  |  |  |  |  |  |  |  |
| Privately owned and operated                                                                                   |  |  |  |  |  |  |  |  |  |
| Club owned and operated                                                                                        |  |  |  |  |  |  |  |  |  |
| Council owned and operated                                                                                     |  |  |  |  |  |  |  |  |  |
| Other (please specify)                                                                                         |  |  |  |  |  |  |  |  |  |
| <b>Do you think that the canteen as it currently operates has appropriate food/beverage options?</b>           |  |  |  |  |  |  |  |  |  |
| Yes                                                                                                            |  |  |  |  |  |  |  |  |  |
| No                                                                                                             |  |  |  |  |  |  |  |  |  |
| <b>Do you have any influence (given your position at the facility) over products available in the canteen?</b> |  |  |  |  |  |  |  |  |  |
| Yes                                                                                                            |  |  |  |  |  |  |  |  |  |
| No                                                                                                             |  |  |  |  |  |  |  |  |  |
| <b>How important do you think it is to have healthy food/drink options at the canteen? (with 0 being not i</b> |  |  |  |  |  |  |  |  |  |
| <b>Have you heard of the food traffic light system before?</b>                                                 |  |  |  |  |  |  |  |  |  |
| Yes                                                                                                            |  |  |  |  |  |  |  |  |  |
| No                                                                                                             |  |  |  |  |  |  |  |  |  |
| <b>How confident are you that you could easily distinguish between a "green" healthy, "amber" choose ca</b>    |  |  |  |  |  |  |  |  |  |
| <b>What are the main barriers to introducing healthier options at your canteen? (Please choose all that ap</b> |  |  |  |  |  |  |  |  |  |
| People don't want to buy healthy options:                                                                      |  |  |  |  |  |  |  |  |  |
| Food waste - fresh food if not bought has to be thrown out:                                                    |  |  |  |  |  |  |  |  |  |
| No time:                                                                                                       |  |  |  |  |  |  |  |  |  |
| Negative financial implication on my total sales:                                                              |  |  |  |  |  |  |  |  |  |
| I have no idea which products can be a healthier alternative to my existing stock:                             |  |  |  |  |  |  |  |  |  |
| People playing sport need to have access to sport drinks:                                                      |  |  |  |  |  |  |  |  |  |
| I don't know enough about nutrition to even think about implementing alternative options in the canteen        |  |  |  |  |  |  |  |  |  |
| The facility is locked into options available through a contracted supplier:                                   |  |  |  |  |  |  |  |  |  |
| I don't know where to source the supply of healthier options:                                                  |  |  |  |  |  |  |  |  |  |
| The price of healthier options is unlikely to be attractive to consumers at our facility:                      |  |  |  |  |  |  |  |  |  |
| There is a lack of storage (fridge or dry) for alternative canteen options:                                    |  |  |  |  |  |  |  |  |  |
| Staff/volunteers would need to be upskilled in food safety practices if healthier options were implemente      |  |  |  |  |  |  |  |  |  |
| Other (please specify):                                                                                        |  |  |  |  |  |  |  |  |  |
| <b>What impact do you think a healthier canteen will have on sales?</b>                                        |  |  |  |  |  |  |  |  |  |
| Increase                                                                                                       |  |  |  |  |  |  |  |  |  |
| Reduce                                                                                                         |  |  |  |  |  |  |  |  |  |
| No impact                                                                                                      |  |  |  |  |  |  |  |  |  |

## Survey 2

|                                                                                                                                                            |  |  |  |  |  |  |  |
|------------------------------------------------------------------------------------------------------------------------------------------------------------|--|--|--|--|--|--|--|
| <b>Please select which option best represents the canteen at your venue:</b>                                                                               |  |  |  |  |  |  |  |
| No canteen                                                                                                                                                 |  |  |  |  |  |  |  |
| Privately owned and operated                                                                                                                               |  |  |  |  |  |  |  |
| Club owned and operated                                                                                                                                    |  |  |  |  |  |  |  |
| Council owned and operated                                                                                                                                 |  |  |  |  |  |  |  |
| Other (please specify)                                                                                                                                     |  |  |  |  |  |  |  |
| <b>Do you think that the canteen as it currently operates has appropriate food/beverage options?</b>                                                       |  |  |  |  |  |  |  |
| Yes                                                                                                                                                        |  |  |  |  |  |  |  |
| No                                                                                                                                                         |  |  |  |  |  |  |  |
| <b>Do you have any influence (given your position at the facility) over products available in the canteen?</b>                                             |  |  |  |  |  |  |  |
| Yes                                                                                                                                                        |  |  |  |  |  |  |  |
| No                                                                                                                                                         |  |  |  |  |  |  |  |
| <b>How important do you think it is to have healthy food/drink options at the canteen? (with 0 being not important at all and 10 being very important)</b> |  |  |  |  |  |  |  |
|                                                                                                                                                            |  |  |  |  |  |  |  |
| <b>Have you heard of the food traffic light system before?</b>                                                                                             |  |  |  |  |  |  |  |
| Yes                                                                                                                                                        |  |  |  |  |  |  |  |
| No                                                                                                                                                         |  |  |  |  |  |  |  |
| <b>How confident are you that you could easily distinguish between a "green" healthy, "amber" healthy and "red" unhealthy option?</b>                      |  |  |  |  |  |  |  |
|                                                                                                                                                            |  |  |  |  |  |  |  |
| <b>What are the main barriers to introducing healthier options at your canteen? (Please choose up to 5)</b>                                                |  |  |  |  |  |  |  |
| People don't want to buy healthy options:                                                                                                                  |  |  |  |  |  |  |  |
| Food waste - fresh food if not bought has to be thrown out:                                                                                                |  |  |  |  |  |  |  |
| No time:                                                                                                                                                   |  |  |  |  |  |  |  |
| Negative financial implication on my total sales:                                                                                                          |  |  |  |  |  |  |  |
| I have no idea which products can be a healthier alternative to my existing stock:                                                                         |  |  |  |  |  |  |  |
| People playing sport need to have access to sport drinks:                                                                                                  |  |  |  |  |  |  |  |
| I don't know enough about nutrition to even think about implementing alternative options in the canteen:                                                   |  |  |  |  |  |  |  |
| The facility is locked into options available through a contracted supplier:                                                                               |  |  |  |  |  |  |  |
| I don't know where to source the supply of healthier options:                                                                                              |  |  |  |  |  |  |  |
| The price of healthier options is unlikely to be attractive to consumers at our facility:                                                                  |  |  |  |  |  |  |  |
| There is a lack of storage (fridge or dry) for alternative canteen options:                                                                                |  |  |  |  |  |  |  |
| Staff/volunteers would need to be upskilled in food safety practices if healthier options were introduced:                                                 |  |  |  |  |  |  |  |
| Other (please specify):                                                                                                                                    |  |  |  |  |  |  |  |
| <b>What impact do you think a healthier canteen will have on sales?</b>                                                                                    |  |  |  |  |  |  |  |
| Increase                                                                                                                                                   |  |  |  |  |  |  |  |
| Reduce                                                                                                                                                     |  |  |  |  |  |  |  |
| No impact                                                                                                                                                  |  |  |  |  |  |  |  |

### Survey 3

|                                                                                                                |  |  |  |  |  |  |  |
|----------------------------------------------------------------------------------------------------------------|--|--|--|--|--|--|--|
| <b>Please select which option best represents the canteen at your venue:</b>                                   |  |  |  |  |  |  |  |
|                                                                                                                |  |  |  |  |  |  |  |
| No canteen                                                                                                     |  |  |  |  |  |  |  |
| Privately owned and operated                                                                                   |  |  |  |  |  |  |  |
| Club owned and operated                                                                                        |  |  |  |  |  |  |  |
| Council owned and operated                                                                                     |  |  |  |  |  |  |  |
| Other (please specify)                                                                                         |  |  |  |  |  |  |  |
|                                                                                                                |  |  |  |  |  |  |  |
| <b>Do you have any influence (given your position at the facility) over products available in the canteen?</b> |  |  |  |  |  |  |  |
|                                                                                                                |  |  |  |  |  |  |  |
| Yes                                                                                                            |  |  |  |  |  |  |  |
| No                                                                                                             |  |  |  |  |  |  |  |
|                                                                                                                |  |  |  |  |  |  |  |
| <b>Did you visit the healthy canteen display at the Basketball Managers Convention and Trade Show?</b>         |  |  |  |  |  |  |  |
|                                                                                                                |  |  |  |  |  |  |  |
| Yes                                                                                                            |  |  |  |  |  |  |  |
| No                                                                                                             |  |  |  |  |  |  |  |
|                                                                                                                |  |  |  |  |  |  |  |
| <b>Have you made any changes as a result of visiting the healthy canteen display?</b>                          |  |  |  |  |  |  |  |
|                                                                                                                |  |  |  |  |  |  |  |
| Yes                                                                                                            |  |  |  |  |  |  |  |
| No                                                                                                             |  |  |  |  |  |  |  |
|                                                                                                                |  |  |  |  |  |  |  |
| <b>Were the changes made in relation to (Please select all that apply):</b>                                    |  |  |  |  |  |  |  |
|                                                                                                                |  |  |  |  |  |  |  |
| Product supply and availability (e g introduced new products):                                                 |  |  |  |  |  |  |  |
| Pricing of products (e g increased the price of 'red' or unhealthy options):                                   |  |  |  |  |  |  |  |
| The availability of products visible to consumers (e g reduced or removed 'red' or unhealthy options):         |  |  |  |  |  |  |  |
| Marketing and promotion (e g posters or signage):                                                              |  |  |  |  |  |  |  |
| Other (please specify):                                                                                        |  |  |  |  |  |  |  |
|                                                                                                                |  |  |  |  |  |  |  |
| <b>Do you have any plans to make changes as a result of visiting the healthy canteen display?</b>              |  |  |  |  |  |  |  |
|                                                                                                                |  |  |  |  |  |  |  |
| Yes                                                                                                            |  |  |  |  |  |  |  |
| No                                                                                                             |  |  |  |  |  |  |  |
|                                                                                                                |  |  |  |  |  |  |  |
| <b>What changes are you interesting in making? (Please select all that apply)</b>                              |  |  |  |  |  |  |  |
|                                                                                                                |  |  |  |  |  |  |  |
| Product supply and availability (e g introduced new products):                                                 |  |  |  |  |  |  |  |
| Pricing of products (e g increased the price of 'red' or unhealthy options):                                   |  |  |  |  |  |  |  |
| The availability of products visible to consumers (e g reduced or removed 'red' or unhealthy options):         |  |  |  |  |  |  |  |
| Marketing and promotion (e g posters or signage):                                                              |  |  |  |  |  |  |  |
| Other (please specify):                                                                                        |  |  |  |  |  |  |  |
